1 **From Vaccine to Pathogen: Circulating Vaccine Derived Poliovirus outbreaks require genetic reversion,**  
2 **low immunity, and high exposure doses**

3 Wesley Wong<sup>1\*</sup>, Jillian Gauld<sup>1\*</sup>, Michael Famulare<sup>1\*</sup>

4

5 **Author Affiliations**

6 1. Institute for Disease Modeling, Global Good, Intellectual Ventures, Bellevue, WA, USA

7 \* Currently employed at the Bill and Melinda Gates Foundation

8

9 **Corresponding Author**

10 Michael Famulare

11 Building IV, 3150 139th Ave SE, Bellevue, WA 98005

12 +1 (425) 691-3327

13 [mfamulare@idmod.org](mailto:mfamulare@idmod.org)

14

15 **Keywords:**

16 Sabin 2, cVDPV2, poliovirus, genetic reversion, evolution, modeling, vaccine

17 **Classification:** BIOLOGICAL SCIENCES: Evolution

18 **Author Contributions**

19 WW and MF were involved with model development, analysis, and interpretation. All authors were  
20 involved with manuscript writing and interpretation. Correspondence and requests for materials should be  
21 addressed to Michael Famulare.

22

23 **Abstract**

24           The oral poliovirus vaccines (OPV) are one of most effective disease eradication tools in public  
25 health. However, the Sabin 2 vaccine strain can revert attenuation and cause outbreaks of circulating,  
26 vaccine-derived poliovirus (cVDPV2) that are clinically indistinguishable from wild poliovirus (WPV).  
27 Accurately assessing cVDP2 risk requires disentangling the complex interaction between epidemiology  
28 and evolutionary biology. Here, we developed a Sabin 2 reversion model that simulates the reversion of  
29 Sabin 2 to WPV based on the clinical differences in shedding duration and infectiousness between  
30 individuals vaccinated with Sabin 2 and those infected with wild poliovirus. Genetic reversion is  
31 informed by a canonical reversion pathway defined by three gatekeeper mutations (A481G, U2909C,  
32 and U398C) and the accumulation of genetic load from deleterious nonsynonymous mutations. Our  
33 model captures essential aspects of both phenotypic and molecular evolution and simulates  
34 transmission using a multiscale transmission model that consolidates the relationships among immunity,  
35 susceptibility, and transmission risk. We show that despite the rapid reversion of Sabin 2, cVDPV2  
36 outbreaks can be controlled by maintaining high levels of population-level immunity and sanitation.  
37 Supplementary immunization activities must maintain high vaccine coverage to prevent future cVDPV2  
38 outbreaks in the targeted intervention zone, but declining global immunity against Sabin 2 makes them  
39 increasingly risky to implement in poor sanitation regions regardless of historical immunization activity.  
40 A combined strategy of assessing and improving sanitation levels in conjunction with high coverage  
41 vaccination campaigns will limit future cVDPV2 emergence and spread.

42

43 **Significance Statement**

44           Since the withdrawal of the Sabin 2 oral poliovirus vaccine (OPV2), circulating vaccine-derived  
45 poliovirus outbreaks caused by the genetic reversion of Sabin 2 vaccine virus (cVDPV2) have been

46 increasing in frequency. The current strategies for combating cVDPV2 involve supplemental  
47 immunization activities with monovalent Sabin 2 oral poliovirus (mOPV2), which can inadvertently seed  
48 future cVDPV2 outbreaks. Accurately assessing future cVDPV2 outbreak risk following mass mOPV2  
49 campaigns is critical poliovirus eradication efforts but must consider the interaction between genetic  
50 reversion and epidemiological transmission. We developed an evolutionary epidemiology model to  
51 integrate Sabin 2 genetic reversion and transmission into a single framework to evaluate their relative  
52 contribution to cVDPV2 outbreaks and inform future intervention strategies.

53

## 54 **Introduction**

55 Mass immunization with oral poliovirus vaccine (OPV) has led to a >99.99% drop in wild  
56 poliovirus (WPV) cases (1) and the complete eradication of Type 2 and Type 3 WPV. The OPVs are highly  
57 efficacious vaccines that confer long-lasting protective immunity (2). A curious feature of these vaccines  
58 is that vaccinated individuals can shed and transmit vaccine virus. Vaccine transmission increases  
59 population-level immunity but is problematic when viruses revert attenuation, resulting in circulating,  
60 vaccine-derived poliovirus (cVDPV) capable of causing paralytic poliomyelitis cases clinically  
61 indistinguishable from WPV (3). Following the eradication of Type 2 WPV, the Global Polio Eradication  
62 Initiative coordinated the global withdrawal of Sabin 2 OPV (OPV2) from routine immunization  
63 schedules (commonly referred to as the Switch) to prevent future sources of circulating, vaccine-derived  
64 Type 2 poliovirus (cVDPV2) (1).

65 Despite the Switch, cVDPV2 outbreaks continue to be a pressing public health concern and have  
66 emerged as a significant issue threatening global poliovirus eradication efforts (1, 4). Although OPV2 is  
67 no longer used in routine immunization, monovalent OPV2 (mOPV2) vaccination campaigns are still  
68 used as supplemental immunization activities (SIAs) to combat cVDPV2 outbreaks. cVDPV2 outbreaks

69 are now reported throughout the African continent, Pakistan, Afghanistan, China, Malaysia and the  
70 Philippines and 29% of the outbreaks in Africa have involved international spread (4, 5). Since the  
71 Switch, 126 mOPV2 campaigns utilizing more than 300 million doses of OPV2 have been implemented to  
72 control cVDPV2 outbreaks (6). These SIAs are estimated to be responsible for seeding over half of the  
73 cVDPV2 outbreaks observed since the Switch (6). Ensuring the future safety and efficacy of these SIA  
74 campaigns while minimizing the risk of seeding future cVDPV2 outbreaks is critical to the success of the  
75 poliovirus eradication initiative.

76 The Sabin 2 vaccine strain was derived from a wild-type isolate (P22/P712/56) passaged in  
77 monkey kidney cells to achieve neurovirulence attenuation (7). However, identifying the genetic  
78 mutations responsible for attenuation has been surprisingly complicated, in part because the progenitor  
79 has not been fully sequenced and because P22/P712/56 is thought to be naturally attenuated relative to  
80 other WPV strains (8). Despite this, phylogenetic analyses of whole genome sequences collected from  
81 cVDPV2 outbreaks suggest a common evolutionary pathway to attenuation reversal (9). This pathway is  
82 characterized by the rapid fixation three gatekeeper mutations, A481G, U2909C, and U398C, within the  
83 first few weeks after vaccination (9, 10). All three mutations have previously been implicated as  
84 molecular determinants of attenuation for Sabin 2 (11–14). A481G and U398C are noncoding mutations  
85 that affect the stability of a 5' hairpin structure that mediates translation efficiency (13, 15, 16) and  
86 U2909C is a nonsynonymous mutation in the VP1 capsid protein.

87 However, genetic reversion is not the sole determinant of cVDPV2 emergence, which we  
88 generally define as an outbreak of vaccine-derived paralytic poliomyelitis cases large enough to be of  
89 public health concern. Environmental sewer samples have identified revertant strains in regions with no  
90 detectable cVDPV2 cases (17). In fact, vaccinated individuals can shed and transmit revertant viruses to  
91 other individuals (10, 18), but whether this results in clinically-detected cVDPV2 outbreaks strongly  
92 depends on the epidemiological context. These cVDPV2 outbreaks are associated with regions with

93 historically poor vaccination rates and low population-level immunity (6, 19). Thus, while Sabin 2  
94 reversion is a prerequisite of cVDPV2 emergence, whether it is transmitted frequently enough to trigger  
95 a public health crisis depends on the interactions between genetic reversion and local epidemiological  
96 conditions.

97 Mathematical models can be useful tools for assessing cVDPV2 emergence risk and  
98 characterizing the evolutionary and epidemiological factors that allow cVDPV2 outbreaks to occur. We  
99 developed an evolutionary-epidemiology model that simulates Sabin 2 reversion as it is transmitted in  
100 an epidemiological model previously calibrated during an mOPV2 clinical trial performed in Matlab,  
101 Bangladesh (20). The combined model allows us to assess the consequences of vaccine reversion in the  
102 context of an actual epidemiological setting. By unifying evolutionary theory, population genetics, and  
103 epidemiology into a single framework, our study provides a holistic understanding of cVDPV2  
104 emergence as it relates to both genetic reversion and transmission.

105

## 106 **Results**

### 107 *Brief model structure overview*

108 We previously developed agent-based multiscale epidemiology model designed to replicate  
109 household community structure and Sabin 2 vaccine transmission during an mOPV2 clinical trial  
110 performed in Matlab, Bangladesh (20, 21). Transmission is contact based and made heterogeneously  
111 depending on household community structure membership (**Figure 1A**). Susceptibility is defined by a  
112 dose-response model that determines the probability of infection given the strain-specific viral  
113 infectiousness, the total viral exposure dose per contact, and the immunity of the recipient host. The  
114 total viral exposure dose is determined by the viral shedding concentration of the infected individual  
115 and the average fecal-oral dose per contact in the population. Immunity is defined by the OPV-

116 equivalent antibody titer that determines infection probability. Individuals with low immunity upon  
117 infection have longer shedding durations and higher viral shedding titers. Further details of the  
118 epidemiology model are described elsewhere (21, 22).

119 Here, we developed and integrated a new Sabin 2 reversion model into the multiscale  
120 epidemiology model. Sabin 2 evolution is modeled as a population of multiple viral lineages founded by  
121 a Sabin 2 vaccine virus strain during vaccination. These viral lineages evolve independently and compete  
122 for the limited availability of naïve or low-immunity individuals in the population. Phenotypic evolution  
123 is driven by the reversion of three gatekeeper mutations (A481G, U2909C, and U398C) and the  
124 accumulation of deleterious nonsynonymous mutations generated through mutation and purged  
125 through selection or genetic drift (**Figure 1B**). We assume complete genetic reversion results in a viral  
126 population whose average infectiousness and shedding duration is identical to those of WPV. Due to the  
127 independent acquisition of mutations across different viruses and viral lineages, individual viruses have  
128 different infectiousness and shedding duration phenotypes even after the three gatekeeper mutations  
129 have reverted.

### 130 *Simulating Sabin 2 molecular evolution*

131 To inform molecular evolution, intra-host substitution rates for the three gatekeeper mutations  
132 were based on estimates previously calculated from 241 Vp1 (viral protein 1) segments from Sabin-like  
133 poliovirus collected during routine surveillance in Nigeria (10, 23). Nonsynonymous and synonymous  
134 substitution rates were calibrated (**SI Appendix**) to a set of whole genome sequences and VP1 capsids  
135 segments isolated from infections from confirmed Sabin 2, Sabin-like, vaccine-derived poliovirus (VDPV)  
136 and cVDPV2 cases (**Figure 2**). One notable feature of poliovirus evolution is the discordance between  
137 short-term evolution following vaccination and long-term evolution after prolonged circulation. Short-  
138 term evolution is dominated by the accumulation of nonsynonymous mutations, as evidenced by the

139 increased rate of nonsynonymous mutation accumulation in the whole genome sequences during the  
140 first year of evolution (**Figure 2B**), the reduction in the ratio of nonsynonymous to synonymous  
141 mutations over time (**Figure 2D**), and the elevated dN/dS ratios of Sabin-like samples compared to  
142 cVDPV2 samples (**Supplemental Figure 1**).

143 We hypothesized that the difference between short-term and long-term evolution represents a  
144 shift in the distribution of fitness effects for nonsynonymous mutations. Simulated nonsynonymous  
145 mutations were divided into two categories: deleterious mutations that can cause a reduction in either  
146 infectiousness or shedding duration, and neutral mutations that have no phenotypic effect. Each  
147 category is associated with a different substitution rate and deleterious nonsynonymous mutations are  
148 purged using a recombination-like process that mimics selection and intra-species recombination within  
149 the host (**SI Appendix**). Deleterious nonsynonymous mutations dominate molecular evolution during the  
150 first year of evolution while neutral nonsynonymous mutations dominate molecular evolution after  
151 prolonged circulation (**Figure 2E**).

#### 152 *Simulating Sabin 2 reversion*

153 Genotype-to-phenotype maps for shedding duration were generated by comparing the  
154 shedding duration of naïve individuals vaccinated with Sabin 2 (median 30.3, average 36 days) with  
155 those infected with WPV (median 40.3, average 48 days) (**SI Appendix**). Due to the rapid intra-host  
156 fixation of the three gatekeeper mutations (**Figure 3A**), we assert that reversion during an infection  
157 extends its shedding duration (**Figure 3B**). Prior to any intra-host evolution, the genotype-to-phenotype  
158 map for shedding duration estimates that naïve individuals vaccinated with non-reverted Sabin 2 have a  
159 median shedding duration of 13.5 days (**Figure 3B**, *dashed red line*). The clinically-observed shedding  
160 durations of Sabin 2 vaccinated individuals (**Figure 3B**, *solid red line*) is realized as the average shedding  
161 durations of different viral genotypes composed of unmutated and reverted Sabin 2 viruses

162 **(Supplemental Table 1)**. After vaccination, 7.6% of simulated vaccinated individuals shed non-reverted  
163 Sabin 2 at the end of shedding, 92.4% shed virus with at least one reverted gatekeeper mutation, and  
164 35.2% shed virus with all three gatekeeper mutations reverted. Interestingly, we did not identify a  
165 deleterious cost (reduction in shedding duration) associated with nonsynonymous mutation  
166 accumulation (**SI Appendix**).

167 The genotype-to-phenotype map describing viral infectiousness was based on clinical  
168 differences of human dose response between Sabin 2 and WPV. Unlike shedding duration, we identified  
169 a small negative effect associated with deleterious nonsynonymous mutations resulting in a reduction in  
170 viral infectiousness (**SI Appendix**). Our model predicts that viral genotypes with no deleterious  
171 nonsynonymous mutations but are reverted at A481G and U2909C are more infectious than typical WPV  
172 strains (**Figure 3C**). Each additional deleterious nonsynonymous mutation reduces infectiousness such  
173 that a viral genotype with all three gatekeeper mutations reverted and nine deleterious mutations is as  
174 infectious as WPV (**Figure 3D**).

175

#### 176 *Examining the evolutionary epidemiology dynamics of Sabin 2 reversion*

177 To explore how Sabin 2 reversion and transmission interact, we simulated transmission  
178 following an mOPV2 campaign targeting 10% of children under five in a population with 10 times the  
179 fecal-oral dose of Matlab ( $2.5 \times 10^{-6}$  grams per contact) five years after vaccination cessation (**Figure 4**).  
180 These epidemics are cyclic (**Figure 4A**) and characterized by boom-bust cycles that eventually stabilize  
181 within the first three years of transmission. Under these conditions, 10% of stochastic replicates failed to  
182 establish stable, endemic transmission. These stochastic replicates failed after the initial expansion wave  
183 collapsed (**Supplemental Figure 2A**). Should transmission recover, the epidemic rebounds and the  
184 proportion of individuals with no immunity (serum neutralizing antibody titer < 8) declines while the



185 proportion of individuals with high immunity (serum neutralizing antibody titer > 256) increases (**Figure**  
186 **4B**). Towards the end of the initial epidemic, the proportion of individuals with no immunity begin to  
187 increase due to a combination of new births and the waning of pre-existing immunity and sets up the  
188 conditions for the next wave of infections.

189 Complete Sabin 2 reversion (**Figure 4C-D**) occurred within the first 200 days of transmission. To  
190 describe the evolutionary dynamics of the simulated viral population, we focused on the expected mean  
191 (the average of the average) phenotype and the variance of the expected mean. While both shedding  
192 duration and infectiousness converged to the WPV phenotype, shedding duration approached it  
193 monotonically while infectiousness exceeded WPV during the first few months of transmission. The  
194 expected means of both phenotypes were not sensitive to changes in infection number. However, the  
195 variance of the expected mean fluctuated over time and was sensitive to epidemiological dynamics. This  
196 variance was smallest at the onset of the epidemic when infection numbers were highest and biggest  
197 around day 400 when infection number was the smallest. The variance of the expected mean was  
198 inversely correlated with total infection number, but its magnitude also depended on the rate with  
199 which the epidemic was increasing or decreasing over time (**Figure 4, Supplemental Figure 3**).

200 Surprisingly, complete Sabin 2 reversion does not guarantee stable transmission. The  
201 simulations with observed transmission failure did not show a lack of evolutionary fitness: the simulated  
202 viral populations in these simulations had infectiousness and shedding durations equivalent to or  
203 exceeding that of WPV (**Supplemental Figure 2B-C**).

#### 204 *Population-level immunity and hygiene are major constraints of cVDPV2 emergence*

205 We next utilized this model to simulate cVDPV2 emergence and understand risk. Our scenarios  
206 included a point importation of an infant vaccinated with Sabin 2, and a mass vaccination campaign with  
207 up to 80% coverage in children under five years of age. We explored scenarios with fecal oral doses

208 equal to, five times greater, and 10 times greater than Matlab (**Figure 5**). The fecal oral dose, combined  
209 with the infection-specific, time-dependent viral shedding concentration per gram of stool (22),  
210 determines the total exposure dose per infectious contact. cVDPV2 emergence was defined as an  
211 outbreak significant enough to trigger a warning from passive routine surveillance efforts. However,  
212 because surveillance is not currently simulated, we operationally define cVDPV2 emergence as a  
213 simulation with sustained cVDPV2 transmission for at least three years.

214 We found zero risk of cVDPV2 emergence following a mass vaccination campaign (**Figure 5A**) or  
215 point importation event (**Figure 5D**) in Matlab with its current fecal oral dose. However, cVDPV2  
216 emergence is possible at higher fecal-oral doses. Under these conditions, cVDPV2 emergence risk  
217 increases with time since vaccination, but is controlled within the community by higher vaccination  
218 coverage. When the fecal-oral dose was five times that of Matlab ( $1.8e-6$  grams per contact), all  
219 vaccination campaigns and point importations immediately after vaccination cessation (year 0) had a  
220 less than 0.05 chance of causing a cVDPV2 emergence (**Figure 5B**). Vaccination campaigns with less than  
221 30% coverage in populations with more than three years of vaccination cessation had the highest risk of  
222 cVDPV2 emergence, with an emergence rate between 20% and 30%. Following point importation,  
223 cVDPV2 emergence risk rises from 0% immediately after cessation to 20% after five years of cessation  
224 (**Figure 5E**).

225 When the fecal-oral dose was ten times that of Matlab ( $2.5e-6$  grams per contact), high  
226 vaccination coverage could not efficiently prevent cVDPV2 emergence (**Figure 5C**). Immediately after  
227 vaccination cessation, simulations with high vaccination coverage ( $> 70\%$  coverage) resulted in cVDPV2  
228 emergence 40-50% of the time. All other scenarios had a greater than 60% chance of cVDPV2  
229 emergence. This increases to a greater than 80% chance following a vaccination campaign with less than  
230 30% coverage in populations with more than three years of vaccination cessation. cVDPV2 emergence

231 risk following a point importation event increases sharply with time since vaccination (**Figure 5F**),  
232 increasing from 5% immediately after cessation to 55% after five years of cessation.

233

## 234 **Discussion**

235 cVDPV2 outbreaks are serious public health dilemmas made possible by viral evolution and  
236 exacerbated by epidemiological conditions. By unifying evolutionary and epidemiological theory into a  
237 single framework, our model assesses cVDPV2 emergence risk in relation to changes in shedding  
238 duration and infectiousness associated with vaccine reversion and the constraints to transmission  
239 imposed by immunity, sanitation, and contact structure. To overcome the lack of direct transmission  
240 measurements for Sabin 2 reversion intermediates, we generated genotype-to-phenotype maps for  
241 shedding duration and viral infectiousness by relying on established molecular evolution and population  
242 genetic theory.

243 Sabin 2 reversion can be viewed as an adaptive process where Sabin 2 must climb up a fitness  
244 landscape to achieve the optimal, WPV-like phenotype. Within the poliovirus virology literature, Sabin 2  
245 is commonly presented as a purely adaptive process where fixed mutations contribute positively to the  
246 emergence of the WPV phenotype (24). However, it is unlikely that all fixed nonsynonymous mutations  
247 are beneficial (25) and viruses must purge deleterious mutations to prevent Muller's Ratchet from  
248 causing an irreversible decline in viral fitness (26, 27). Muller's ratchet can be avoided by engaging in  
249 intra-species or inter-species recombination with Enterovirus C viruses (28) and by altering the  
250 distribution of fitness effects (DOFE) for fixed mutations (29, 30). The latter is based on Fisher's  
251 Geometric Model (FGM) of adaptive evolution, which predicts that mutations with large-phenotypic  
252 effects are unlikely to fixate the closer an organism is to its fitness optimum. Our model incorporates  
253 FGM by attributing large phenotypic effects to the gatekeeper mutations and specifying

254 nonsynonymous mutation rates so that early adaptive evolution is dominated by deleterious  
255 nonsynonymous mutations while long-term evolution is dominated by neutral ones.

256           Interestingly, we failed to identify a deleterious cost associated with nonsynonymous mutations  
257 and shedding duration but did identify one associated with nonsynonymous mutations and infectivity.  
258 This finding suggests that there are differences between intra-host and inter-host selection. This could  
259 reflect strong purifying selection induced by the highly competitive intra-host survival dynamics due to  
260 high viral titers. Conversely, the deleterious cost associated with infectiousness could result from the  
261 genetic drift induced by the severe sampling of viral genotypes during person-to-person transmission  
262 (25, 31). Strong genetic drift could weaken the efficacy of purifying selection in removing deleterious  
263 mutations associated with inter-host transmission, but more work is needed to assess differences in  
264 inter- and intra-host selection. The phenotypes we modeled are the consolidation of multiple factors  
265 such as cell invasion, replication, immune evasion, and environmental survival. These subfactors likely  
266 contribute to both shedding duration and infectiousness, but our ability to map molecular evolution to  
267 these subfactors remains limited.

268           At its core, cVDPV2 emergence is an evolutionary and epidemiological problem that requires a  
269 combined approach to properly assess how the two interact. From an evolutionary perspective, the  
270 availability of susceptible hosts and the distribution of transmissions dictates the strength of genetic  
271 drift. Once the gatekeeper mutations are fixed, the phenotypic stability of the viral population is  
272 maintained as a mutation-selection-drift balance and the range of phenotypic values explored by the  
273 viral population is determined by the total number of infected individuals in the population. From an  
274 epidemiological perspective, Sabin 2 reversion causes infectiousness and shedding duration to rapidly  
275 increase within the first 200 days of vaccination and allow more individuals to become infected. Despite  
276 the emergence of WPV-like viruses in our simulations, complete genetic reversion of Sabin 2 does not  
277 guarantee a cVDPV2 outbreak. Whether these viruses cause a cVDPV2 outbreak requiring public health

278 intervention depends on population-level immunity and the average viral exposure dose per infectious  
279 contact (4, 6, 22, 32).

280 The current strategies for controlling cVDPV2 involve implementing aggressive mOPV2 SIA  
281 activities in outbreak response zones and neighboring regions, intensifying routine immunization in  
282 high-risk areas with inactivated polio vaccine (IPV), ensuring a sufficient supply of Sabin 2 OPV for future  
283 eradication strategies, and identifying high cVDPV2 outbreak risk zones (33). Our work clearly shows  
284 that even regions with historically high vaccination rates are prone to cVDPV2 outbreaks if sanitation is  
285 poor. Evaluations of high cVDPV2 outbreak risk regions should include sanitation assessments and utilize  
286 tools designed to measure fecal contamination for other fecal-oral pathogens such as *E. coli* (34). Prior  
287 to mass immunization with OPV2, sanitation assessments should be made to assess the risk of a cVDPV2  
288 outbreak in both the targeted intervention zone and in the surrounding regions. These assessments will  
289 be useful for resource allocation and for determining the minimum coverage needed to prevent future  
290 cVDPV2 outbreaks. Regions with poor sanitation will require aggressive, high-coverage SIA vaccination  
291 campaigns to prevent seeding future cVDPV2 outbreaks.

292 Sanitation assessments will also help public health officials determine whether additional WASH  
293 (water, sanitation, and hygiene) interventions are needed to supplement ongoing vaccination activity.  
294 Our study reconfirms that there are sanitation regimes defined by high fecal oral doses that is  
295 guaranteed to seed future cVDPV2 outbreaks (22), regardless of vaccination coverage. Although long-  
296 term investments in infrastructure are prohibitively expensive, relatively simple measures such as the  
297 installation of sanitary latrines and drinking water tubewells have been effective at reducing fecal  
298 contamination in Matlab, Bangladesh (35). Optimistically, short-term sanitation interventions may be  
299 effective if implemented similarly to an emergency response campaign (36), especially if they are  
300 targeted at vaccine recipients and their immediate household community members (21). These targeted,  
301 short-term sanitation interventions could alleviate some of the challenges associated with non-

302 compliance, long-term adherence failure, and poor implementation that reduce the efficacy of standard  
303 WASH interventions (37, 38).

304 Our model lays the foundations for integrating population genetic theory and epidemiology to  
305 study the evolutionary epidemiology dynamics of rapidly evolving infectious diseases. The success of our  
306 framework hinges on an understanding of a pathogen's evolutionary trajectory as well as the initial and  
307 ending phenotypic states. We anticipate our model will be extended to the novel OPV2 (nOPV2)  
308 candidates (39) as more about their clinical phenotypes and molecular evolution are known. Depending  
309 on how attenuated and evolutionarily stable the novel OPV2 candidates are relative to Sabin 2, mass  
310 nOPV2 vaccination may reduce the need to also control sanitation levels. We also anticipate our model  
311 will be useful for assessing the risks associated with the live-attenuated varicella zoster vaccines, which  
312 also shows strong evidence of attenuation reversion conferred by a commonly accessed evolutionary  
313 pathway (40).

## 314 **Materials and Methods**

### 315 **Sequencing Data**

316 We downloaded fasta files for the VP1 segments and whole genome sequences of Sabin 2 and  
317 Sabin 2 derived genomes from Genbank. These samples were collected across 102 studies performed in  
318 countries including Egypt, Madagascar, China, Nigeria, the United States, Israel, Switzerland, and the  
319 Democratic Republic of Congo. Multiple sequence alignments were first generated using MUSCLE  
320 (v3.8.31) (41). Sequences were compared to a known Sabin 2 sample (accession ID: AY184220) to  
321 identify and remove insertions. Sequences with long internal gaps (>15 bases) and coverage < 30%  
322 (percentage of called bases) were discarded. Coding sequence alignments from the whole genome  
323 sequences were generated for each of the poliovirus coding regions by generating multiple sequence

324 alignments for each of the 15 translated protein coding sequences of the poliovirus genome. These  
325 alignments were further filtered to remove samples with < 90% coverage.

326 A total of 177 whole genome sequences and 1,643 VP1 sequences were retained for analysis.  
327 Samples were classified as Sabin 2, Sabin-Like, VDPV (vaccine-derived poliovirus), iVDPV  
328 (immunodeficiency-related vaccine-derived poliovirus), cVDPV2 based on their original study  
329 classifications. Viruses that displayed <1% VP1 nucleotide sequence difference from the parental Sabin 2  
330 genome were classified as Sabin-lik2 and those with 1-15% nucleotide sequence difference were  
331 classified as VDPV. VDVPVs isolated from immunodeficient individuals were classified as iVDPV while  
332 samples with evidence of having originated from prior transmission are classified as cVDPV2. The whole  
333 genome sample set also included the Lansing and MEF-1 laboratory strains as well as several engineered  
334 Lansing strain derivatives. Accession numbers, classifications, and study origin for each sample are in  
335 **Supplemental File 1** and **Supplemental File 2**. FASTA files for the aligned VP1 and whole genome coding  
336 sequences are available on the **Github repository**.

337 Coding sequence alignments were used to generate a phylogenetic tree using RAxML (v8.2.10)  
338 with a general time reversible CAT (GTRCAT) model (42). Estimates of nonsynonymous and synonymous  
339 mutation counts and dN/dS were based off the RAxML generated phylogenetic tree. Estimates of  
340 nonsynonymous and synonymous mutation counts from the VP1 sequences were counted directly from  
341 the sequence data. Nonsynonymous and synonymous mutation counts for codons with multiple  
342 mutations were averaged across all possible, unweighted evolutionary paths.

### 343 **Model Description**

#### 344 *Defining Genotypes*

345 Genotypes are defined relative to the Sabin-2 genome and defined by the reversion state of  
346 three gatekeeper mutations (A481G, U2909C, and U398C), and the number of newly derived

347 nonsynonymous and synonymous mutations in the rest of the genome. The Sabin-2 genome is defined  
348 as an array with 6 different mutation classes:

$$G_{S2} = [0, 0, 0, 0, 0, 0]$$

349 The first three are Boolean flags that indicate the allelic states of A481G, U2909C, and U398C (0 =  
350 unreverted, 1 = reverted). The last three elements represent the total number of deleterious  
351 nonsynonymous, neutral nonsynonymous, and synonymous mutations present in the genome. The  
352 counts in the latter categories exclude the three gatekeeper mutations. Splitting nonsynonymous  
353 mutations into neutral and deleterious simplifies the true distribution of fitness effects and was  
354 necessary to reconcile phenotypic and molecular evolution (**SI Appendix**). These genotypes represent  
355 the consensus sequence of fixed variants within vaccinated and infected individuals.

356 For evolved poliovirus strains, we use the notation:

$$G_{i,j,k,nonsyn_{del},nonsyn_{neutral},syn}$$

357  
358 where  $i$ ,  $j$ , and  $k$  are replaced with the allelic states of A481G, U209C, and U398C.  $nonsyn_{neutral}$ ,  
359  $nonsyn_{del}$ , and  $syn$  are replaced with their respective counts or replaced with X if these mutation  
360 classes are irrelevant. For example,  $G_{0,0,0,0,0,0}$  is equivalent to the unmutated Sabin-2 vaccine strain ( $G_{S2}$ )  
361 and  $G_{1,1,1,10,2,15}$  is a genotype where all three gatekeeper mutations have reverted and where 10  
362 deleterious nonsynonymous, 2 neutral nonsynonymous, and 15 synonymous mutations have  
363 accumulated.

364 *Genomic evolution: Modeling Sabin 2 molecular evolution*



365 Genomic evolution is modeled using intra-host substitution rates ( $\lambda$ ), the fixation of newly  
366 derived mutations within the host, for each mutation class ( $\lambda_{A481G}$ ,  $\lambda_{U2909C}$ ,  $\lambda_{U398C}$ ,  $\lambda_{syn}$ ,  
367  $\lambda_{nonsyn,del}$ ,  $\lambda_{nonsyn,neutral}$ ). This substitution rate reflects the true de novo mutation rate, genetic drift,  
368 and selection within the host. This simplification allows us to use a single consensus genome to  
369 represent the fixed mutations present in the intra-host viral population. Each mutation class (the three  
370 gatekeeper mutations, synonymous mutations, deleterious nonsynonymous mutations, and neutral  
371 nonsynonymous mutations) is associated with a substitution rate that describes its expected fixation  
372 time (**Supplemental File 3**).

373 To accommodate the effects of intra-host competition and recombination, deleterious  
374 nonsynonymous mutation accumulation also depends on a recombination-like mechanism with rate  
375  $\lambda_{recombination}$  that purges deleterious mutations from the genome (26, 28, 43). Intra-host substitution  
376 rates for the gatekeeper mutations were used as described in (10) while  $\lambda_{syn}$ ,  
377  $\lambda_{nonsyn,del}$ ,  $\lambda_{nonsyn,neutral}$ , and  $\lambda_{recombination}$  were calibrated to the whole genome sequences and  
378 VP1 segments downloaded from Genbank. Only confirmed Sabin 2, Sabin-Like, VDPV, and cVDPV  
379 samples were used for calibration. All other samples were excluded from calibration. Calibration details  
380 are provided in the **SI Appendix**.

381 Upon vaccination with Sabin 2, fixation times for all mutation classes are calculated by drawing  
382 from exponential distributions whose rate parameters are defined by the substitution rate of each  
383 mutation class. For the three gatekeeper mutations, these fixation times determine the time to  
384 reversion. For nonsynonymous and synonymous mutations, these fixation times determine the time to  
385 the next substitution event. To prevent Mueller's Ratchet from resulting in infinite deleterious mutation  
386 load, we also draw a time to the next "recombination" event from an exponential distribution defined  
387 by  $\lambda_{recombination}$ . During each "recombination" event, the model draws a random number from a

388 discrete, uniform distribution ranging from zero to  $n_{nonsyn,deleterious}$ , the number of deleterious  
389 nonsynonymous mutations in the genome, to determine the number of deleterious mutations to  
390 remove. Conceptually, this represents purifying selection within the host and allows us to accommodate  
391 the assumed increase in purifying selection as Sabin 2 reverts to cVDPV2. Pseudocode is provided in  
392 **Supplemental Figure 4.**

393

#### 394 *Genotype to Phenotype: Mapping molecular genetics to shedding duration and infectiousness*

395 A core assumption of our model is that each of the three gatekeeper mutations contributes to  
396 the final, WPV phenotype proportional to their relative substitution rates. This assumption is based in  
397 part on evolutionary fitness landscape and adaptation theory, which posits that beneficial mutations of  
398 large effect are more likely to be fixed early on when an organism is far the optimal fitness peak on a  
399 simple, non-rugged fitness landscape (29, 44). By definition, attenuated Sabin 2 vaccine strains are far  
400 from the optimal fitness peak for human infection and genetic reversion is the process of climbing the  
401 fitness landscape to reach the optimal, WPV-like phenotype. Because of their fast substitution rate, we  
402 attribute the bulk of phenotypic change to A481G, followed by U2909C, and to a lesser extent U398C.  
403 The ranked ordering of phenotypic effect in our model is supported in the literature. A481G and U2909C  
404 are consistently identified as the primary molecular determinants of reversion in *in vitro* and *in vivo*  
405 studies (11–16). U398C is only occasionally identified by these studies but its recurrent fixation within  
406 the first few months of transmission (9, 10) suggest its adaptive benefit may be too small to be assessed  
407 in laboratory-based assays relative to A481G and U2909C.

408 Two epidemiologically relevant phenotypes were calculated for each infection based on its  
409 corresponding genotype: 1) shedding duration and 2) infectiousness. Both shedding duration and  
410 infectiousness are based on a previously described poliovirus dose-response model (22). Conceptually,

411 the shedding duration is analogous to intra-host selection and infectiousness is analogous to inter-host  
 412 selection. Details regarding model calibration are deferred to the **SI Appendix**.

413 We assume shedding duration follows a log-normal survival distribution with the form:

$$P(\text{shedding at } t \mid N_{ab_{pre}}; \text{infected at } t = 0) \quad (1)$$

$$= \frac{1}{2} \left( 1 - \operatorname{erf} \left( \frac{\ln(t) - (M_g - \log(\delta) \log_2(N_{ab_{pre}}))}{\sqrt{2} \ln(S_g)} \right) \right)$$

414 where  $N_{ab_{pre}}$  is the pre-infection OPV-equivalent antibody titer (22). For each genotype,  $M_g$  and  $S_g$  are  
 415 genome-specific parameters that influence the average shedding duration and its standard deviation.  
 416 The mean of this log-normal distribution is defined by  $M_g - \log(\delta) \log_2(N_{ab_{pre}})$  and its standard  
 417 deviation defined by  $S_g$ .

$$M_g = \log(\mu_{S2}) + w_{shedding,g} \quad (2)$$

418

$$S_g = \sigma \sqrt{|1 + w_{shedding,g}|} \quad (3)$$

419

$$w_{shedding,g} = 0 + s_{dur,A481G} * G_{A481G} + s_{dur,U2909C} * G_{U2909C} + s_{dur,U398C} * G_{U398C} \quad (4)$$

$$+ s_{dur,nonsyn_{del}} * n_{nonsyn_{del}}$$

420

421 where  $\mu_{S2}$  is the average shedding duration of a completely unevolved Sabin 2 virus ( $G_{S2}$ ) in  
 422 immunologically naive individuals ( $N_{ab_{pre}} = 1$ ),  $\sigma$  the standard deviation in shedding duration for  $G_{S2}$ .  
 423  $w_{shedding,g}$  defines the shedding duration fitness of a strain,  $G_{A481G}$ ,  $G_{U2909C}$ , and  $G_{U398C}$  refer to the

424 allelic status of the three gatekeeper mutations, and  $S_{dur,A481G}$ ,  $S_{dur,U2909C}$ ,  $S_{dur,U398C}$  are selection  
425 coefficients that describe the change in shedding duration conferred by each of these mutations. Note  
426 that fitness is additive but in log space.

427 Upon infection or vaccination, we randomly draw a shedding duration from a lognormal  
428 distribution with mean  $M_g - \log(\delta) \log_2(N_{abpre})$  and standard deviation  $S_g$ . A core feature of our  
429 shedding duration model is that new gatekeeper mutations arising within the host extends shedding  
430 duration. If a new gatekeeper mutation is acquired, the shedding duration is extended:

$$Duration = Duration_{initial} * e^{S_{gateway} + Norm(0,\sigma)\sqrt{S_{gateway}}} \quad (5)$$

431

$$S_{gateway} \in \{S_{dur,A481G}, S_{dur,U2909C}, S_{dur,U398C}\} \quad (6)$$

432

433 where  $D_{initial}$  is the shedding duration before acquisition of the gatekeeper mutation and  $S_{gateway}$  is  
434 the shedding duration selection coefficient for the gatekeeper mutation. Note that  $Duration_{initial}$  and  
435 the increase in shedding duration,  $e^{S_{gateway} + Norm(0,\sigma)\sqrt{S_{gateway}}}$ , are log-normally distributed and that  
436 multiplying two, independent log-normal distributions results in a log-normal distribution whose mean  
437 and variance are the sum of the mean and variances of the original distributions. As a result, shedding  
438 duration is the summation of multiple, genome-specific shedding durations whose weights are time-  
439 dependent and depend on the fixation of A481G, U2909C, U398C and the accumulation of  
440 nonsynonymous mutations.

441 Infectiousness is defined by a beta-Poisson model that assumes a single infectious unit is  
442 sufficient to start an infection and that multiple infectious units contribute independently to the  
443 probability of infection:

$$P(\text{infection} | \text{dose}, N_{ab}) = 1 - \left(1 + \frac{\text{dose}}{\beta_g}\right)^{-\alpha(N_{ab})^{-\gamma}} \quad (7)$$

444

445 where  $\alpha$  and  $\beta_g$  are parameters for a beta-Poisson function, dose is the viral exposure dose, and  $\gamma$   
 446 captures the reduction in shedding probability with increasing immunity. Altering the  $\beta$  parameter  
 447 shifts the beta-poisson function along the x-axis (dose) and altering the  $\alpha$  parameter changes its slope.  
 448 Differences in infectiousness between Sabin 2 strains and WPV can be modeled using the same  $\alpha$  but  
 449 with modified  $\beta$  parameters (22). We interpret the  $\beta$  parameter as a measurement of strain infectivity  
 450 and define  $\beta_g$  as:

451

$$\beta_g = \frac{\beta}{(1 + s_{inf,A481G})^{G_{A481G}} (1 + s_{inf,U2909C})^{G_{U2909C}} (1 + s_{inf,U398C})^{G_{U398C}} (1 + s_{inf,nonsyn_{del}})^{n_{nonsyn_{del}}}} \quad (8)$$

452

453

454 where  $\beta$  is the strain infectivity parameter for Sabin 2 (22) (assuming no evolution),  $s_{inf,A481G}$ ,  
 455  $s_{inf,U2909C}$ ,  $s_{inf,U398C}$ ,  $s_{inf,nonsyn_{del}}$  are selection coefficients denoting the change in infectiousness  
 456 conferred by each of the gatekeeper mutations, and  $n_{nonsyn_{del}}$  are the number of nonsynonymous  
 457 mutations in the genome. Parameter estimates were obtained by comparing the CCID50 between Sabin  
 458 2 and WPV (**SI Appendix**). The inferred selection coefficients for the three gatekeeper mutations are  
 459 positive (increases infectiousness) while the selection coefficient for deleterious nonsynonymous  
 460 mutations was negative (decreases infectiousness). Infectiousness is calculated only at the onset of  
 461 either vaccination or infection.

462

463 **Acknowledgements**

464 We acknowledge all members of the Institute for Disease Modeling, Global Good, and the Bill and  
465 Melinda Gates Foundation for their useful discussion and input. We also acknowledge Adam Luring and  
466 Andrew Valesano for early manuscript edits and comments.

467 **Funding**

468 Funding was provided by Bill and Melinda Gates through the Global Good Fund. Funders had no role in  
469 the study design, data collection, analysis, interpretation, or writing of the manuscript. The  
470 corresponding author had full access to all the data in our study and had final responsibility for the  
471 decision to submit for publication.

472 **Data Availability**

473 Data and code will be made publicly available at  
474 [https://github.com/InstituteforDiseaseModeling/MultiscaleModeling/tree/evo\\_epistasis](https://github.com/InstituteforDiseaseModeling/MultiscaleModeling/tree/evo_epistasis) upon  
475 publication.

476 **Declaration of Interests**

477 The authors declare no competing interests during the study. WW, JG, and MF were employed by the  
478 funders through the Bill and Melinda Gates Foundation after study completion.

479 **References**

- 480 1. F. Khan, *et al.*, Progress Toward Polio Eradication — Worldwide, January 2016–March 2018.  
481 *MMWR Morb Mortal Wkly Rep* 2019, 524–528 (2018).
- 482 2. A. S. Bandyopadhyay, J. Garon, K. Seib, W. A. Orenstein, Polio vaccination: past, present and  
483 future. *Future Microbiol.* **10**, 791–808 (2015).

- 484 3. H. E. Jenkins, *et al.*, Implications of a Circulating Vaccine-Derived Poliovirus in Nigeria. *N. Engl. J.*  
485 *Med.* **362**, 2360–2369 (2010).
- 486 4. J. Jorba, *et al.*, Update on Vaccine-Derived Poliovirus Outbreaks — Worldwide, January 2018–  
487 June 2019. *Morb. Mortal. Wkly. Rep.*, 1024–1028 (2049).
- 488 5. M. Alleman, *et al.*, Update on Vaccine-Derived Poliovirus Outbreaks - Worldwide July 2019–  
489 February 2020. *MMWR Morb Mortal Wkly Re*, 89–495 (2020).
- 490 6. G. R. Macklin, *et al.*, Evolving epidemiology of poliovirus serotype 2 following withdrawal of the  
491 type 2 oral poliovirus vaccine. *Science (80-. )*, eaba1238 (2020).
- 492 7. J. W. Almond, The attenuation of poliovirus neurovirulence. *Annu. Rev. Microbiol.* **41**, 153–180  
493 (1987).
- 494 8. A. B. Sabin, L. R. Boulger, History of Sabin attenuated poliovirus oral live vaccine strains. *J. Biol.*  
495 *Stand.* **1**, 115–118 (1973).
- 496 9. A. Stern, *et al.*, The Evolutionary Pathway to Virulence of an RNA Virus. *Cell* **169**, 35-46.e19  
497 (2017).
- 498 10. M. Famulare, *et al.*, Sabin Vaccine Reversion in the Field: a Comprehensive Analysis of Sabin-Like  
499 Poliovirus Isolates in Nigeria. *J. Virol.* **90**, 317–331 (2015).
- 500 11. O. M. Kew, R. W. Sutter, E. M. de Gourville, W. R. Dowdle, M. A. Pallansch, Vaccine-derived  
501 polioviruses and the endgame strategy for global polio eradication. *Annu. Rev. Microbiol.* **59**,  
502 587–635 (2005).
- 503 12. R. J Duintjer Tebbens, *et al.*, Oral Poliovirus Vaccine Evolution and Insights Relevant to Modeling  
504 the Risks of Circulating Vaccine-Derived Polioviruses (cVDPVs). *Risk Anal.* **23** (2013).

- 505 13. A. R. Muzychenko, *et al.*, Coupled mutations in the 5'-untranslated region of the Sabin poliovirus  
506 strains during in vivo passages: structural and functional implications. *Virus Res.* **21**, 111–122  
507 (1991).
- 508 14. K. M. S. de M. Cassemiro, *et al.*, Molecular and Phenotypic Characterization of a Highly Evolved  
509 Type 2 Vaccine-Derived Poliovirus Isolated from Seawater in Brazil, 2014. *PLoS One* **11**,  
510 e0152251–e0152251 (2016).
- 511 15. E. A. Simoes, P. Sarnow, An RNA hairpin at the extreme 5' end of the poliovirus RNA  
512 genome modulates viral translation in human cells. *J. Virol.* **65**, 913 LP – 921 (1991).
- 513 16. R. B. Ren, E. G. Moss, V. R. Racaniello, Identification of two determinants that attenuate vaccine-  
514 related type 2 poliovirus. *J. Virol.* **65**, 1377–1382 (1991).
- 515 17. H. Asghar, *et al.*, Environmental Surveillance for Polioviruses in the Global Polio Eradication  
516 Initiative. *J. Infect. Dis.* **210**, S294–S303 (2014).
- 517 18. R. Abraham, P. Minor, G. Dunn, J. F. Modlin, P. L. Ogra, Shedding of Virulent Poliovirus Revertants  
518 during Immunization with Oral Poliovirus Vaccine after Prior Immunization with Inactivated Polio  
519 Vaccine. *J. Infect. Dis.* **168**, 1105–1109 (1993).
- 520 19. I. M. Blake, *et al.*, Type 2 Poliovirus Detection after Global Withdrawal of Trivalent Oral Vaccine.  
521 *N. Engl. J. Med.* **379**, 834–845 (2018).
- 522 20. M. Taniuchi, *et al.*, Community transmission of type 2 poliovirus after cessation of trivalent oral  
523 polio vaccine in Bangladesh: an open-label cluster-randomised trial and modelling study. *Lancet.*  
524 *Infect. Dis.* **17**, 1069–1079 (2017).
- 525 21. M. Famulare, *et al.*, Community structure mediates Sabin 2 polio vaccine virus transmission.  
526 *medRxiv*, 2020.07.01.20144501 (2020).



- 527 22. M. Famulare, C. Selinger, K. A. McCarthy, P. A. Eckhoff, G. Chabot-Couture, Assessing the stability  
528 of polio eradication after the withdrawal of oral polio vaccine. *PLOS Biol.* **16**, e2002468 (2018).
- 529 23. S. Wassilak, *et al.*, Outbreak of type 2 vaccine-derived poliovirus in Nigeria: emergence and  
530 widespread circulation in an underimmunized population. *J. Infect. Dis.* **203**, 898–909 (2011).
- 531 24. K. M. Thompson, R. J. Duintjer Tebbens, Modeling the dynamics of oral poliovirus vaccine  
532 cessation. *J. Infect. Dis.* **210 Suppl**, S475-84 (2014).
- 533 25. A. L. Hughes, Near-Neutrality: the Leading Edge of the Neutral Theory of Molecular Evolution.  
534 *Ann N Y Acad Sci* **1133**, 162–179 (2008).
- 535 26. L. Chao, Fitness of RNA virus decreased by Muller’s ratchet. *Nature* **348**, 454–455 (1990).
- 536 27. T. Leitner, The Puzzle of HIV Neutral and Selective Evolution. *Mol. Biol. Evol.* **35**, 1355–1358  
537 (2018).
- 538 28. Y. Xiao, *et al.*, RNA Recombination Enhances Adaptability and Is Required for Virus Spread and  
539 Virulence. *Cell Host Microbe* **19**, 493–503 (2016).
- 540 29. O. Tenaillon, The Utility of Fisher’s Geometric Model in Evolutionary Genetics. *Annu. Rev. Ecol.*  
541 *Evol. Syst.* **45**, 179–201 (2014).
- 542 30. D. L. Hartl, C. H. Taubes, Towards a theory of evolutionary adaptation. *Genetica* **102–103**, 525–  
543 533 (1998).
- 544 31. J. T. McCrone, *et al.*, Stochastic processes constrain the within and between host evolution of  
545 influenza virus. *Elife* **7**, e35962 (2018).
- 546 32. K. A. McCarthy, G. Chabot-Couture, M. Famulare, H. M. Lyons, L. D. Mercer, The risk of type 2  
547 oral polio vaccine use in post-cessation outbreak response. *BMC Med.* **15**, 175 (2017).

- 548 33. Geneva: World Health Organization, “Strategy for the Response to Type 2 Circulating Vaccine-  
549 Derived Poliovirus 2020–2021: An addendum to the Polio Endgame Strategy 2019-2023” (2020).
- 550 34. Y. Wang, *et al.*, Multipathway Quantitative Assessment of Exposure to Fecal Contamination for  
551 Young Children in Low-Income Urban Environments in Accra, Ghana: The SaniPath Analytical  
552 Approach. *Am. J. Trop. Med. Hyg.* **97**, 1009–1019 (2017).
- 553 35. K. Zaman, *et al.*, Can cholera ‘hotspots’ be converted to cholera ‘coldspots’ in cholera endemic  
554 countries? The Matlab, Bangladesh experience. *Int. J. Infect. Dis.* **95**, 28–31 (2020).
- 555 36. T. Yates, J. Allen, M. L. Joseph, D. Lantagne, “Short-term WASH interventions in emergency  
556 responses in low- and middle-income countries” (2017).
- 557 37. A. Ramesh, K. Blanchet, J. H. J. Ensink, B. Roberts, Evidence on the Effectiveness of Water,  
558 Sanitation, and Hygiene (WASH) Interventions on Health Outcomes in Humanitarian Crises: A  
559 Systematic Review. *PLoS One* **10**, e0124688–e0124688 (2015).
- 560 38. M. Wolfe, M. Kaur, T. Yates, M. Woodin, D. Lantagne, A Systematic Review and Meta-Analysis of  
561 the Association between Water, Sanitation, and Hygiene Exposures and Cholera in Case–Control  
562 Studies. *Am. J. Trop. Med. Hyg.* **99**, 534–545 (2018).
- 563 39. P. Van Damme, *et al.*, The safety and immunogenicity of two novel live attenuated monovalent  
564 (serotype 2) oral poliovirus vaccines in healthy adults: a double-blind, single-centre phase 1  
565 study. *Lancet* **394**, 148–158 (2019).
- 566 40. J. Breuer, Molecular Genetic Insights Into Varicella Zoster Virus (VZV), the vOka Vaccine Strain,  
567 and the Pathogenesis of Latency and Reactivation. *J. Infect. Dis.* **218**, S75–S80 (2018).
- 568 41. R. C. Edgar, MUSCLE: a multiple sequence alignment method with reduced time and space  
569 complexity. *BMC Bioinformatics* **5**, 113 (2004).

- 570 42. A. Stamatakis, RAxML version 8: a tool for phylogenetic analysis and post-analysis of large  
571 phylogenies. *Bioinformatics* **30**, 1312–1313 (2014).
- 572 43. M. Bessaud, M.-L. Joffret, B. Blondel, F. Delpyroux, Exchanges of genomic domains between  
573 poliovirus and other cocirculating species C enteroviruses reveal a high degree of plasticity. *Sci.*  
574 *Rep.* **6**, 38831 (2016).
- 575 44. E. Svensson, R. Calsbeek, *The Adaptive Landscape in Evolutionary Biology* (OUP Oxford, 2012).

576

577

578

579

580

581

582

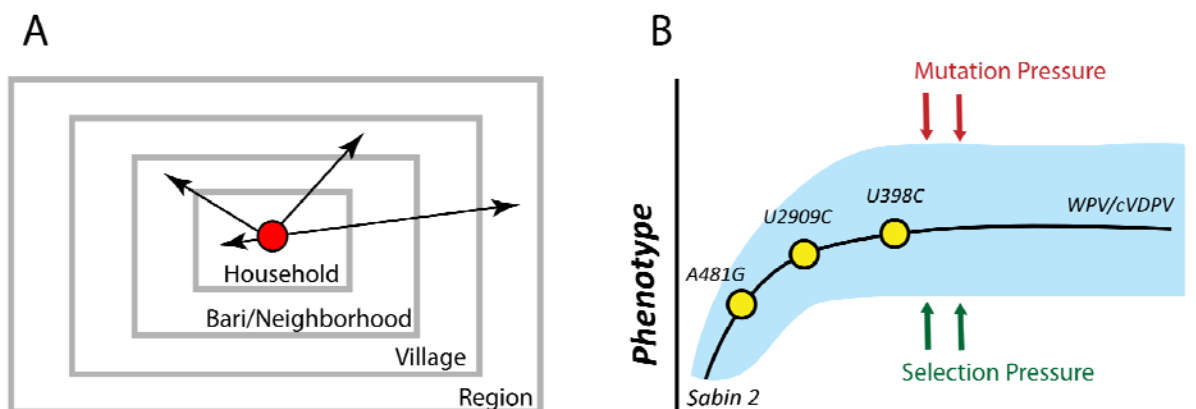

583

584 **Figure 1 Sabin 2 transmission and reversion schematic A)** Multiscale epidemiology model. Individuals  
585 are organized into a series of nested, demographic scales defined by households, *baris*/neighborhoods,  
586 and villages that together define the greater region. The *bari* is an intergenerational living arrangement  
587 of closely related individuals specific to Matlab, the study population the epidemiology model was  
588 calibrated to. Conceptually, it is analogous to a neighborhood. Infectious contacts occur at different  
589 rates to individuals in each of these demographic scales. During each infectious contact, infected  
590 individuals transmit a viral dose that depends on their individual viral shedding concentration and the  
591 average fecal oral dose per contact in the population. **B)** Sabin 2 reversion model. Sabin 2 evolution is  
592 modeled as a population of competing viral lineages whose average phenotypic end state distribution is  
593 identical to that of WPV. Reversion is driven by the acquisition of three gatekeeper mutations (A481G,  
594 U2909C, U398C) and the acquisition of deleterious mutations introduced through mutation and purged  
595 through selection.  
596

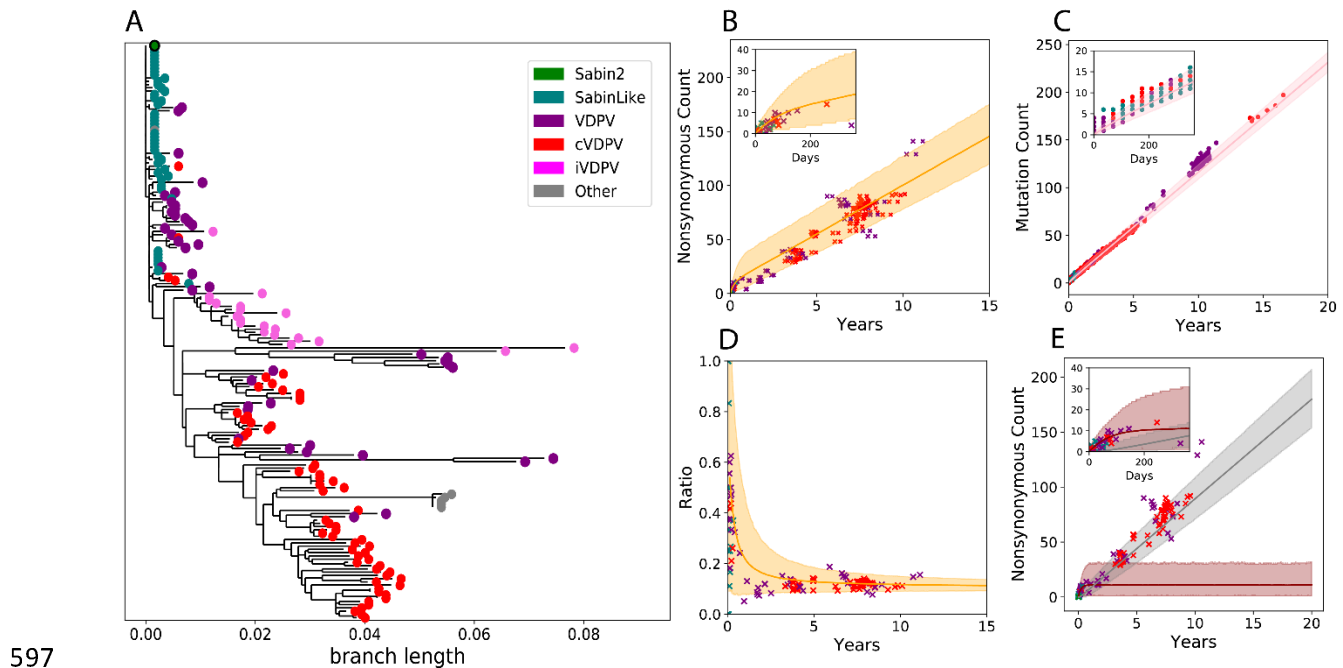

598 **Figure 2 Molecular evolution.** **A)** Phylogenetic tree based on the nonsynonymous mutations from the  
599 177 whole genome sequences used to calibrate our model. Samples were categorized as Sabin 2, Sabin-  
600 Like, vaccine-derived poliovirus isolated from immunocompromised individuals (iVDPV), vaccine-derived  
601 poliovirus (VDPV), and cVDPV2. The other category includes the Lansing and MEF-1 laboratory strains as  
602 well as several engineered strains derived from the Lansing strain. Samples classified as iVDPV or  
603 “other” were excluded from model calibration. **B)** Simulated genome-wide nonsynonymous mutation  
604 accumulation over time (*orange*) compared against those observed in the Sabin 2, Sabin-Like, VDPV, and  
605 cVDPV2 whole genome sequences. **C)** Simulated (*pink*) VP1 mutation (synonymous and  
606 nonsynonymous) accumulation over time compared against the mutation counts observed in 1,643 VP1  
607 segments. **D)** The ratio of nonsynonymous and synonymous mutations throughout the genome over  
608 time. **E)** Simulated genome-wide nonsynonymous counts partitioned into deleterious (*brown*) and  
609 neutral (*grey*). Across all figures, the solid line is the mean simulation outcome and the shaded area  
610 marks the boundaries of the middle 95%. Empirical data is represented by points and colored according  
611 to the legend in panel **A**. Time was calculated by dividing the number of synonymous mutations per  
612 sample by the synonymous substitution rate ( $3.16E-05$  substitutions/bp/day). The insets in **B,C,** and **E**  
613 are close ups of the first year of evolution to better show short-term evolution dynamics.  
614

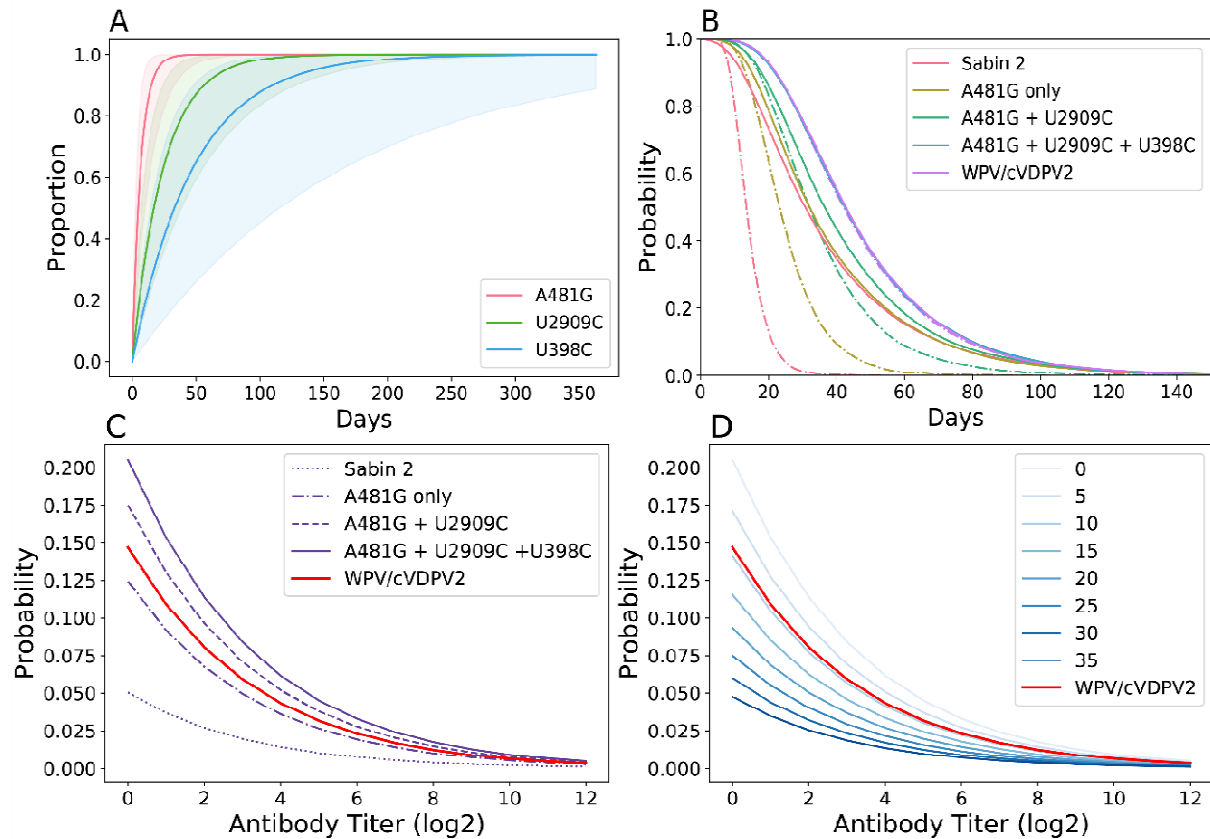

615

616 **Figure 3 Phenotypic Evolution A)** Cumulative density reversion probability functions for the three  
617 gatekeeper mutations. The solid line is the mean and the shading the 95% confidence interval. **B)**  
618 Shedding duration profile of immunologically naïve individuals infected with Sabin 2, WPV/cVDPV2, and  
619 three different intermediate viral genotypes. The dotted lines are the shedding durations of the initial  
620 viral genotype assuming no further reversion or evolution. The solid line are the shedding durations of  
621 each viral genotype where the reversion of new gatekeeper mutations extends the current shedding  
622 duration. Nonsynonymous mutations have no discernable phenotypic effect with regards to shedding  
623 duration. **C and D)** Viral infectiousness. Each curve shows strain-specific probability of infection given a  
624 single CCID50 dose plotted against immunity. Panel **C** shows infectiousness following the acquisition of  
625 each of the three gatekeeper mutations. Panel **D** emphasizes the role of deleterious nonsynonymous

626 mutation and shows the infection probability of different viral genotypes with all gatekeeper mutations  
627 and deleterious nonsynonymous mutations count ranging from zero to 35.  
628

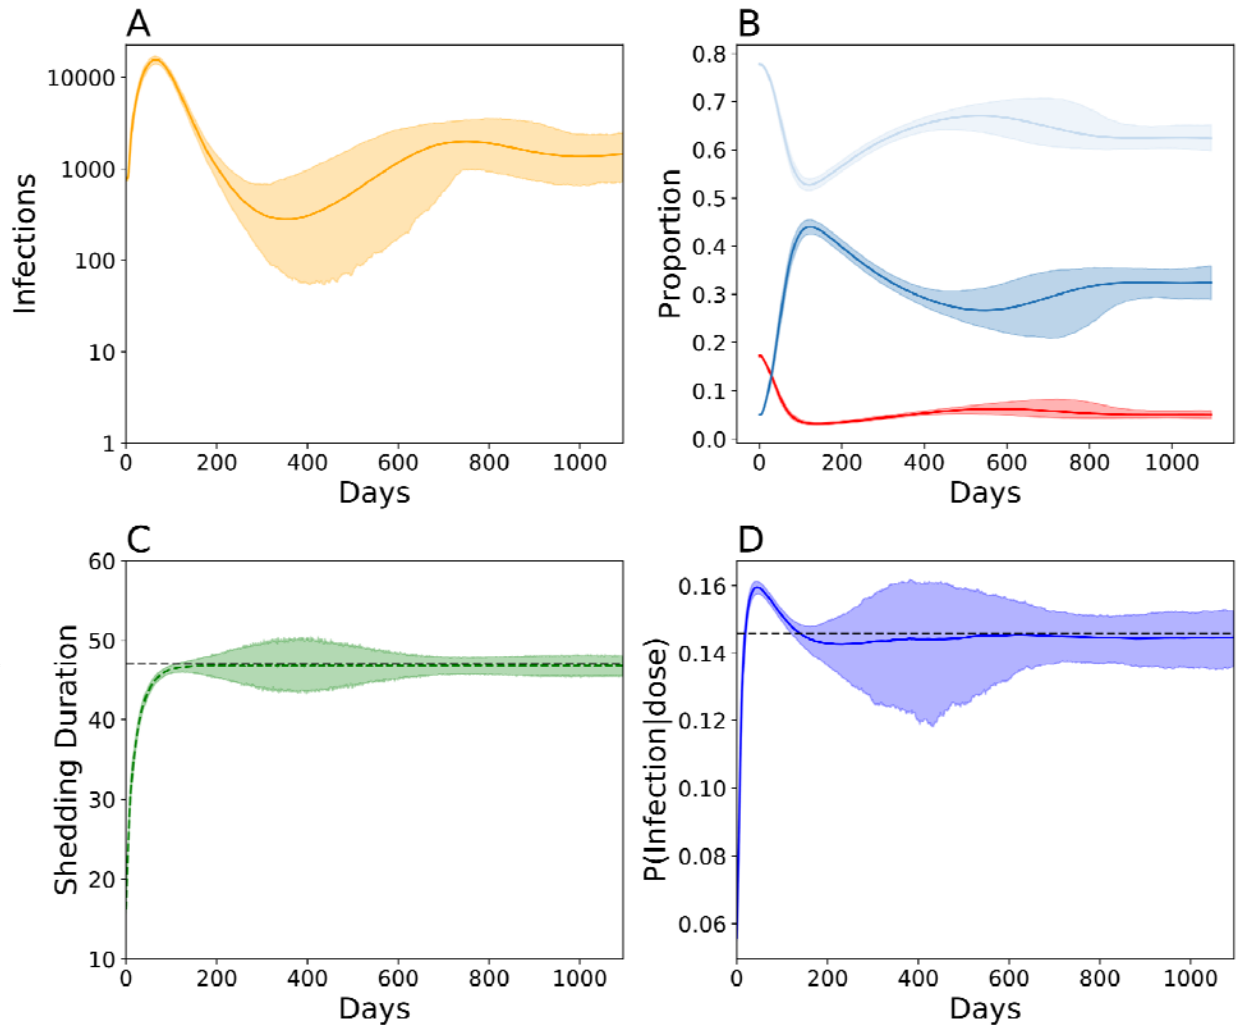

629  
630 **Figure 4 Evo-epidemiological dynamics** following a mass vaccination campaign targeting 10% of children  
631 under five, five years post-vaccination cessation in Matlab, Bangladesh. Simulations assume 10x the  
632 fecal oral dose in Matlab to ensure stable transmission and conditioned on stable, endemic transmission  
633 for at least three years. **A)** Total number of infected individuals over time. Solid line indicates the mean  
634 and the shading the boundaries of the middle 95% from 200 simulations **B)** Longitudinal immune

635 profiles for individuals with low immunity (*red*, antibody titer < 8), intermediate immunity (*light blue*,  
636 antibody titer > 8 and < 256), and high immunity (*dark blue*, antibody titer > 256). **C**) Shedding duration  
637 evolution in naïve individuals over time. **D**) Viral infectiousness evolution over time. For panels **B-D**, the  
638 solid line denotes the simulated average and the boundaries the 95% confidence interval around the  
639 mean. For panels **C** and **D**, the dashed black line indicates the average WPV phenotype.

640

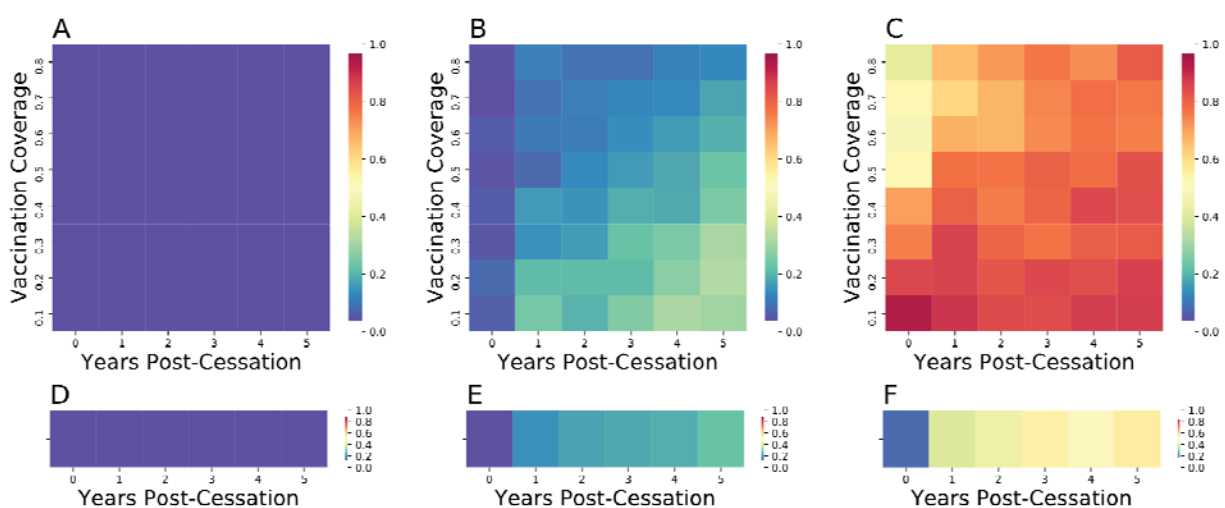

641

642 **Figure 5 cVDPV2 outbreak risk.** cVDPV2 emergence after a mOPV2 vaccination campaign (**A-C**) or  
643 importation of a single infant immunized with Sabin 2 (**D-F**) occurring after up to five years of  
644 vaccination cessation with fecal-oral doses equivalent to (**A/D**), five times greater (**B/E**), and 10 times  
645 greater (**C/F**) than that inferred for Matlab during an mOPV2 clinical trial.

646



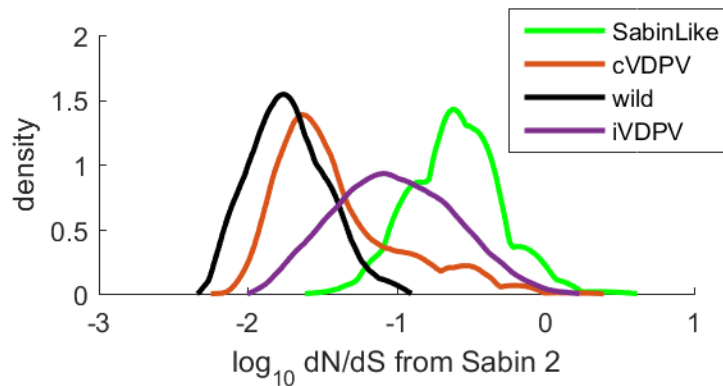

647

648 **Supplemental Figure 1** dN/dS ratios for Sabin 2-like, cVDPV2, WPV, and iVDPVs.

649

650

651

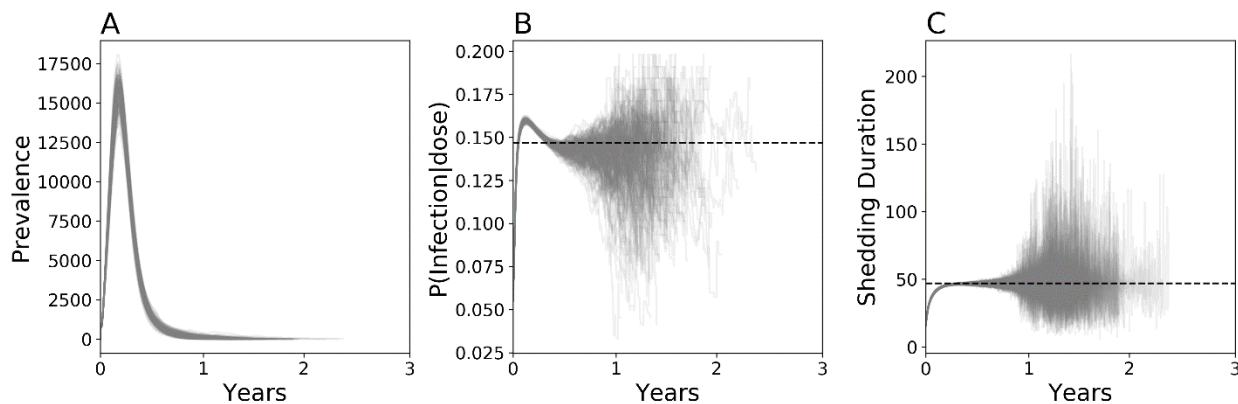

652

653 **Supplemental Figure 2 Simulated evolutionary and epidemiology dynamics** following a mass

654 vaccination campaign targeting 10% of children under five, five years post-vaccination cessation in

655 Matlab, Bangladesh, conditioned on epidemic extinction within the first three years of transmission. **A)**

656 Total number of infected individuals over time **B)** Infectiousness represented as the probability of

657 infecting an immunologically naïve individual given single CCID50 unit dose. **C)** Shedding duration in

658 immunologically naïve individuals. Each line represents a different simulation outcome.

659

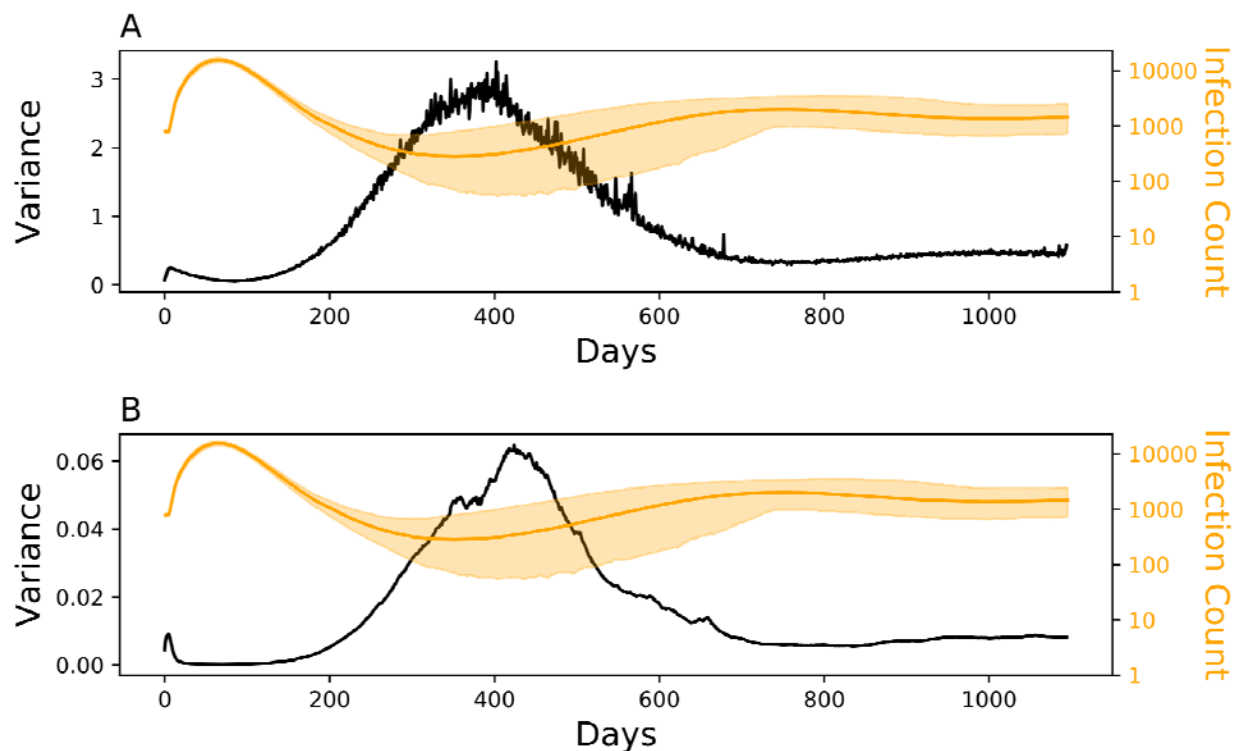

660

661 **Supplemental Figure 3** The variance of the expected mean (*black*) for shedding duration (**A**) and  
662 infectiousness (**B**) compared against infection count (*orange*). The solid orange line is the mean and  
663 shading the boundaries of the middle 95 percentile from 200 simulations and identical to **Figure 4A**.

---

**Algorithm 1: Sabin 2 Intra-Host Molecular evolution**

---

**Initialization:**

Step 1: Set reversion times for unreverted gateway mutations  
**for** *mutation* in *A481G, U2909C, U398C* **do**  
    **if not reverted** **then**  
        | Draw reversion time,  $t_{reversion\_mutation}$ , from Exponential( $\lambda_{mutation}$ )  
    **end**  
**end**

Step 2: Set substitution times for non-gateway mutations  
**for** *mutation* in *nonsyn<sub>del</sub>, nonsyn<sub>neutral</sub>, syn* **do**  
    | Draw substitution time,  $t_{substitution\_mutation}$ , from Exponential( $\lambda_{mutation}$ )  
**end**

Step 3: Set recombination time  
    Draw recombination time,  $t_{recomb}$ , from Exponential( $\lambda_{recomb}$ )

**Intra-host Evolution:**

**while**  $t_{infection} < t_{shed}$  **do**  
    Step 1: Check if unreverted gateway mutations will revert  
    **for** *mutation* in *A481G, U2909C, U398C* **do**  
        **if**  $t_{infection} = t_{reversion\_mutation}$  **then**  
            | Revert *mutation*  
        **end**  
    **end**  
    Step 2: Check if new non-gateway mutations are fixed  
    **for** *mutation* in *nonsyn<sub>del</sub>, nonsyn<sub>neutral</sub>, syn* **do**  
        **if**  $t_{infection} = t_{reversion\_mutation}$  **then**  
            | Increase mutation count,  $n_{mutation}$ , by 1  
            | Draw a new  $t_{mutation}$  from Exponential( $\lambda_{mutation}$ )  
        **end**  
    **end**  
    Step 3: Check if deleterious nonsynonymous mutations are purged  
    **if**  $t_{infection} = t_{recomb}$  **then**  
        | Draw X from Uniform(0,  $n_{nonsyn\_del}$ )  
        | Subtract X from the deleterious nonsynonymous mutation count,  $n_{nonsyn\_del}$   
        | Draw a new  $t_{recomb}$  from Exponential( $\lambda_{recomb}$ )  
    **end**

---

666

| Genotype                | Proportion           | Expected Shedding Duration |
|-------------------------|----------------------|----------------------------|
| Sabin 2 (no reversions) | 0.076 (0.059, 0.093) | 14.39 (14.08, 14.69)       |
| A481G only              | 0.186 (0.162, 0.211) | 25.46 (24.71, 26.24)       |
| U2909C only             | 0.024 (0.014, 0.034) | 20.39 (19.85, 20.92)       |
| U398C only              | 0.01 (0.004, 0.016)  | 18.98 (18.52, 19.47)       |
| A481G + U398C           | 0.075 (0.059, 0.091) | 33.53 (32.46, 34.62)       |
| U398C + U2909C          | 0.005 (0.001, 0.01)  | 26.90 (26.10, 27.72)       |
| A481G + U2909C          | 0.273 (0.247, 0.300) | 36.08 (34.93, 37.26)       |
| A481G + U2909C + U398C  | 0.352 (0.325, 0.382) | 47.51 (45.93, 49.174)      |

667

668 **Supplemental Table 1** Final viral genotypes in primary vaccine recipients and the expected shedding  
669 durations of individuals infected with these genotypes, assuming no further reversion. Bootstrapped  
670 confidence interval for the mean were calculated from 1000 simulated primary vaccinations, repeated  
671 1000 times. Shedding durations are reported in days. Sabin 2 in this table is defined as a viral genotype  
672 with zero gatekeeper reversions.

673

674 **Supplemental File 1** Accession numbers and study origins of the whole genome sequences

675 **Supplemental File 2** Accession numbers and study origins of the VP1 segments

676
